# Supplementary material for: Elafin as a Prognostic Marker in Esophageal Squamous Cell Carcinoma: A Pilot Study Using Three-Dimensional Imaging and Genomic Profiling
Source: MDPI journal article supplement (doi:10.3390/cancers15153825), 2023-07-27

# Full unedited gel for Figure 5D

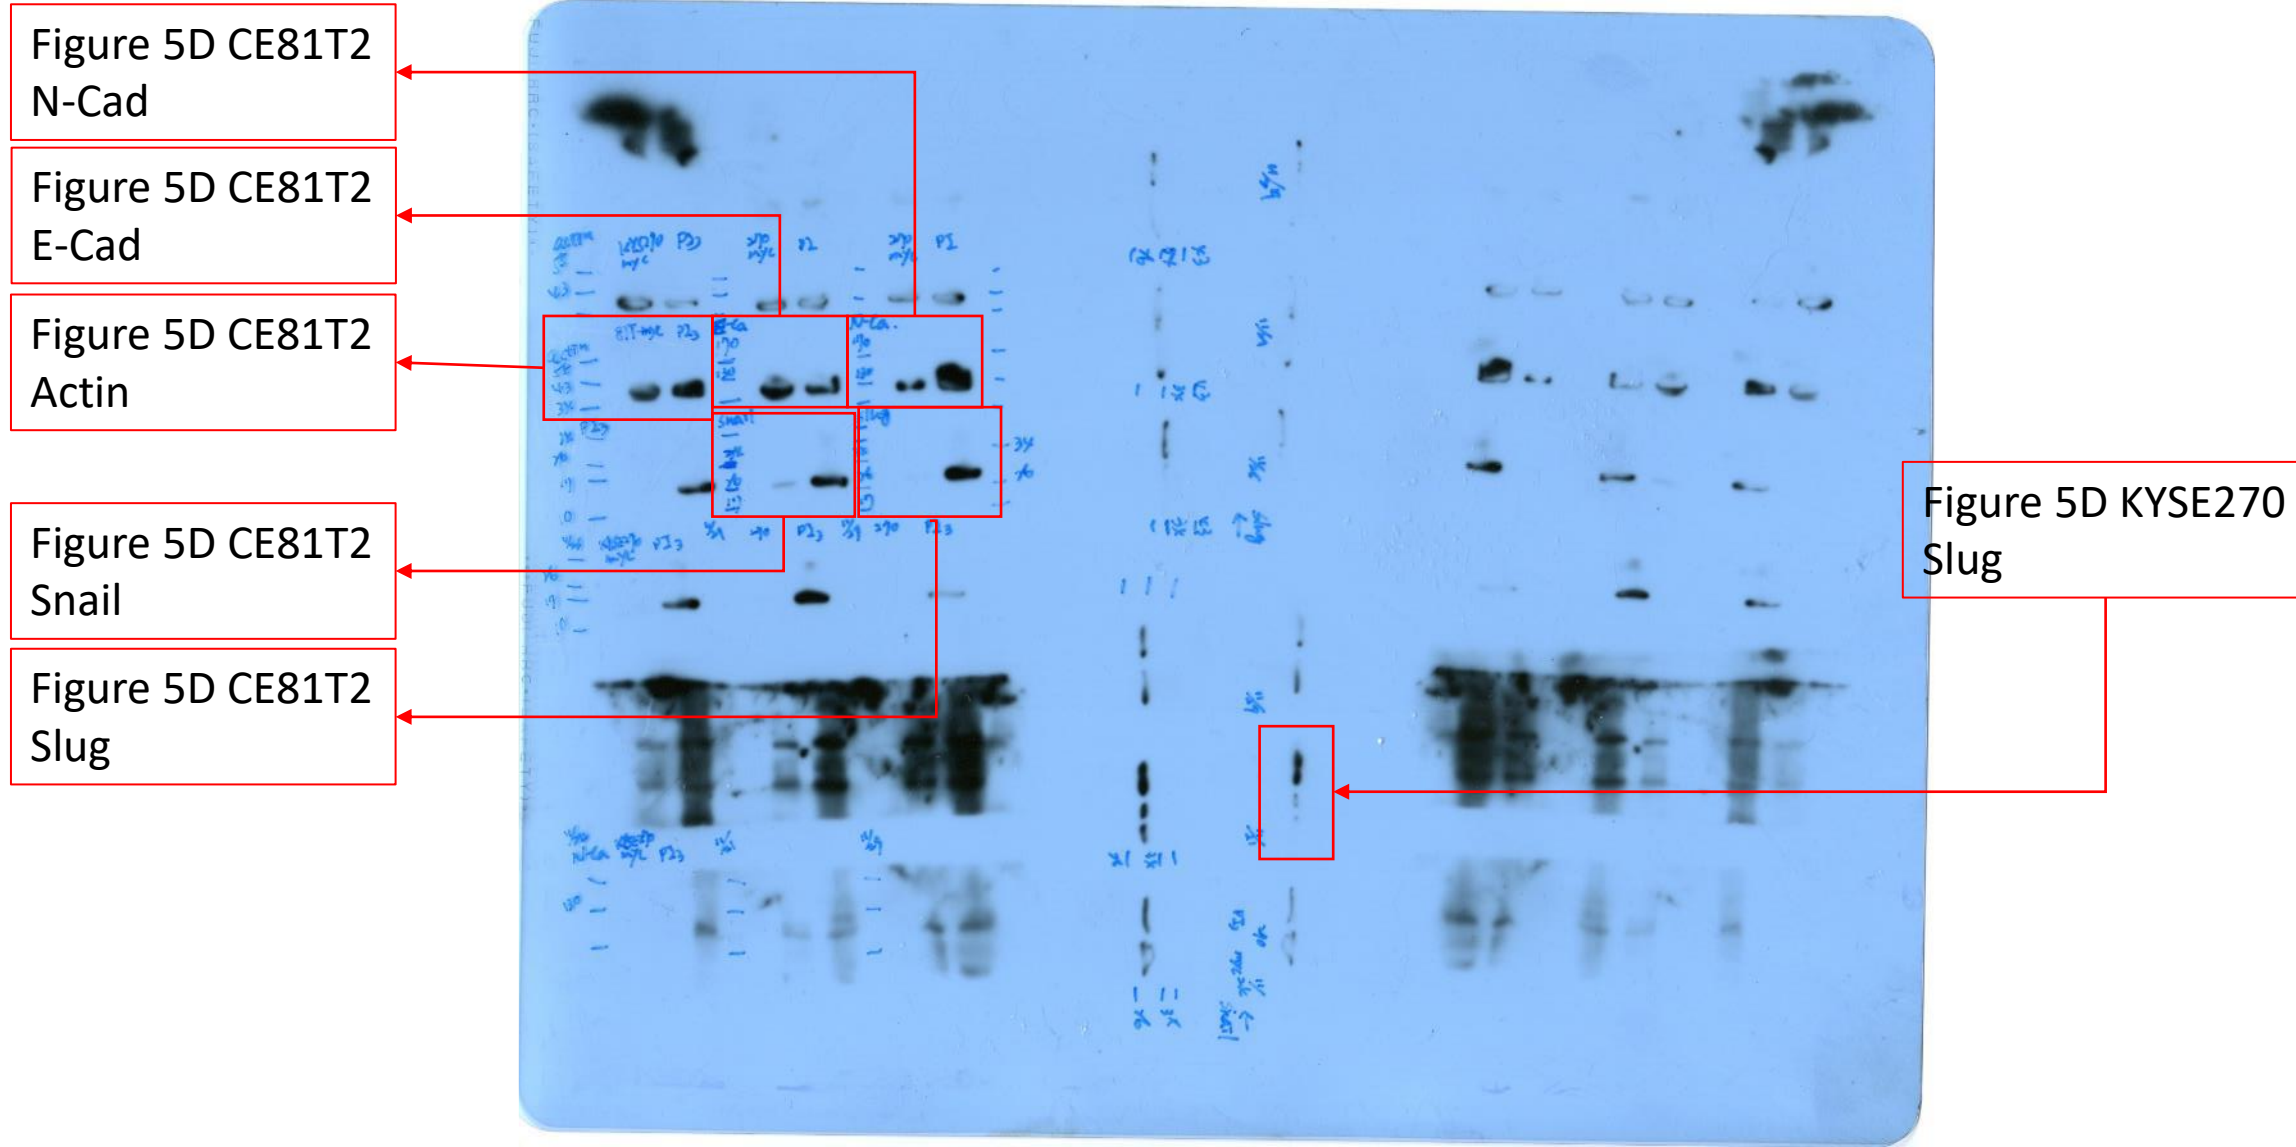

# Full unedited gel for Figure 5D

Figure 5D KYSE270  
N-Cad

Figure 5D KYSE270  
E-Cad

Figure 5D KYSE270  
Snail

Figure 5D KYSE270  
Actin

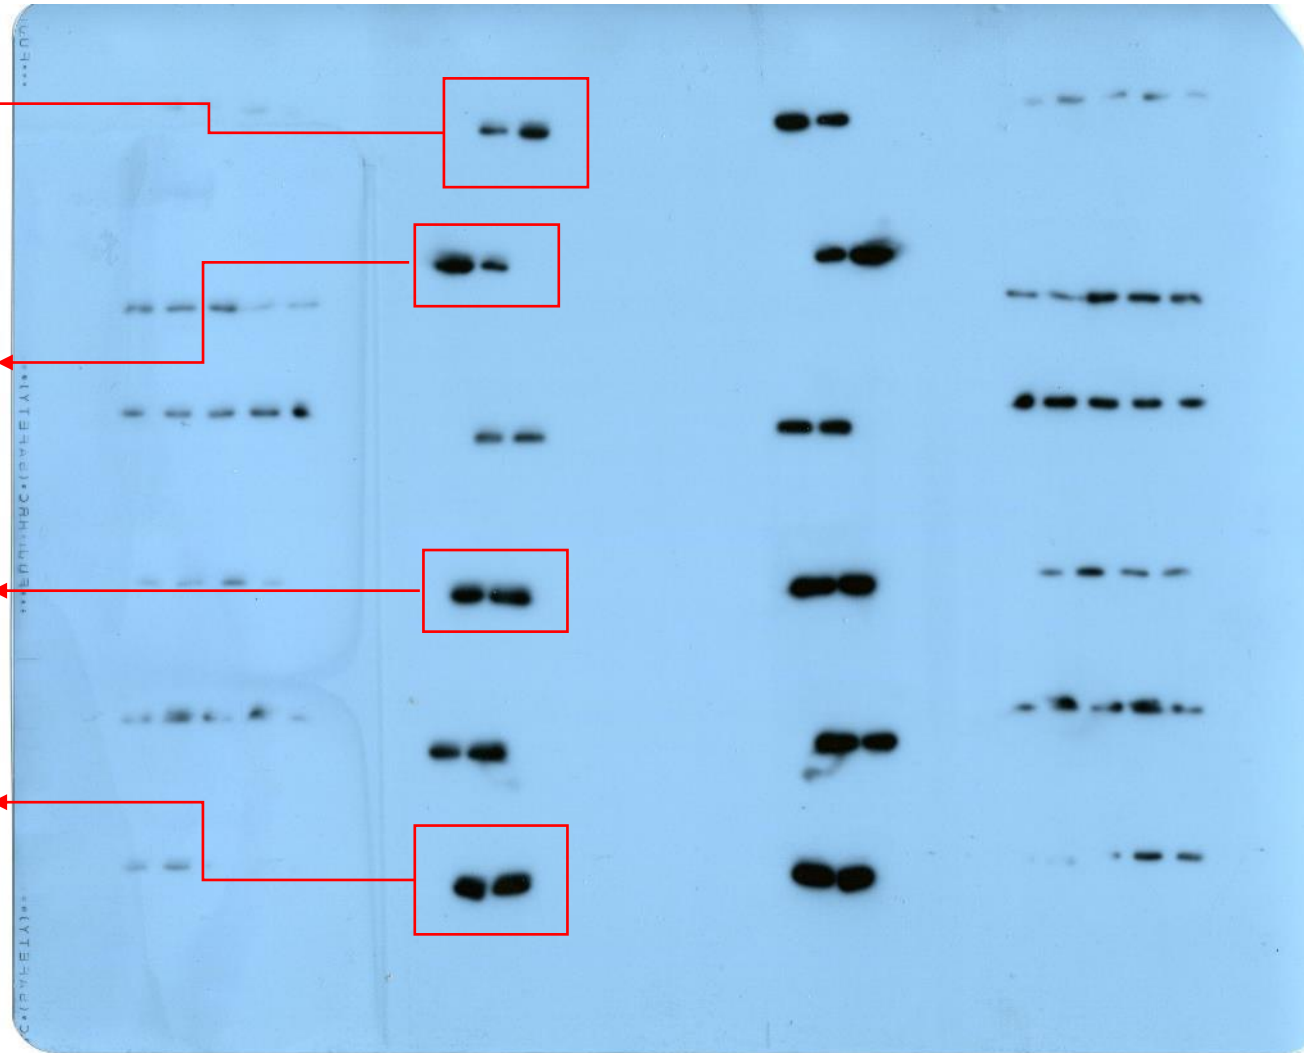

# Full unedited gel for Figure 5E

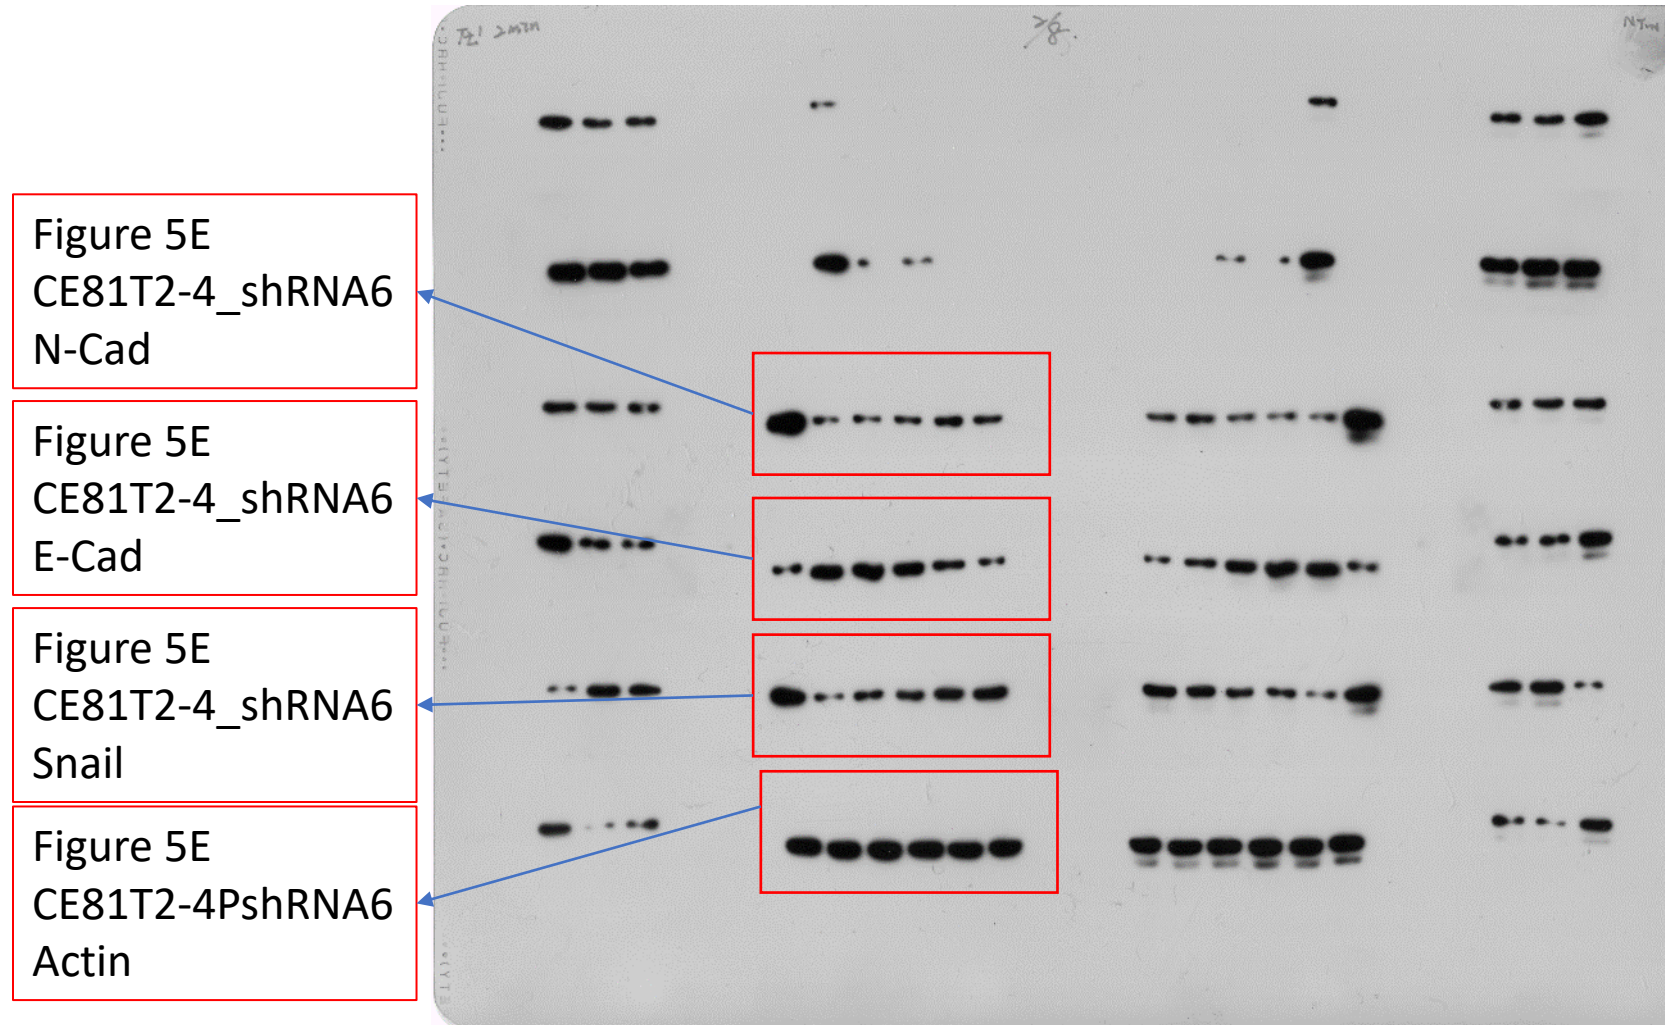

# Full unedited gel for Figure 5E

Figure 5E  
CE81T2-4\_shRNA6  
Slug

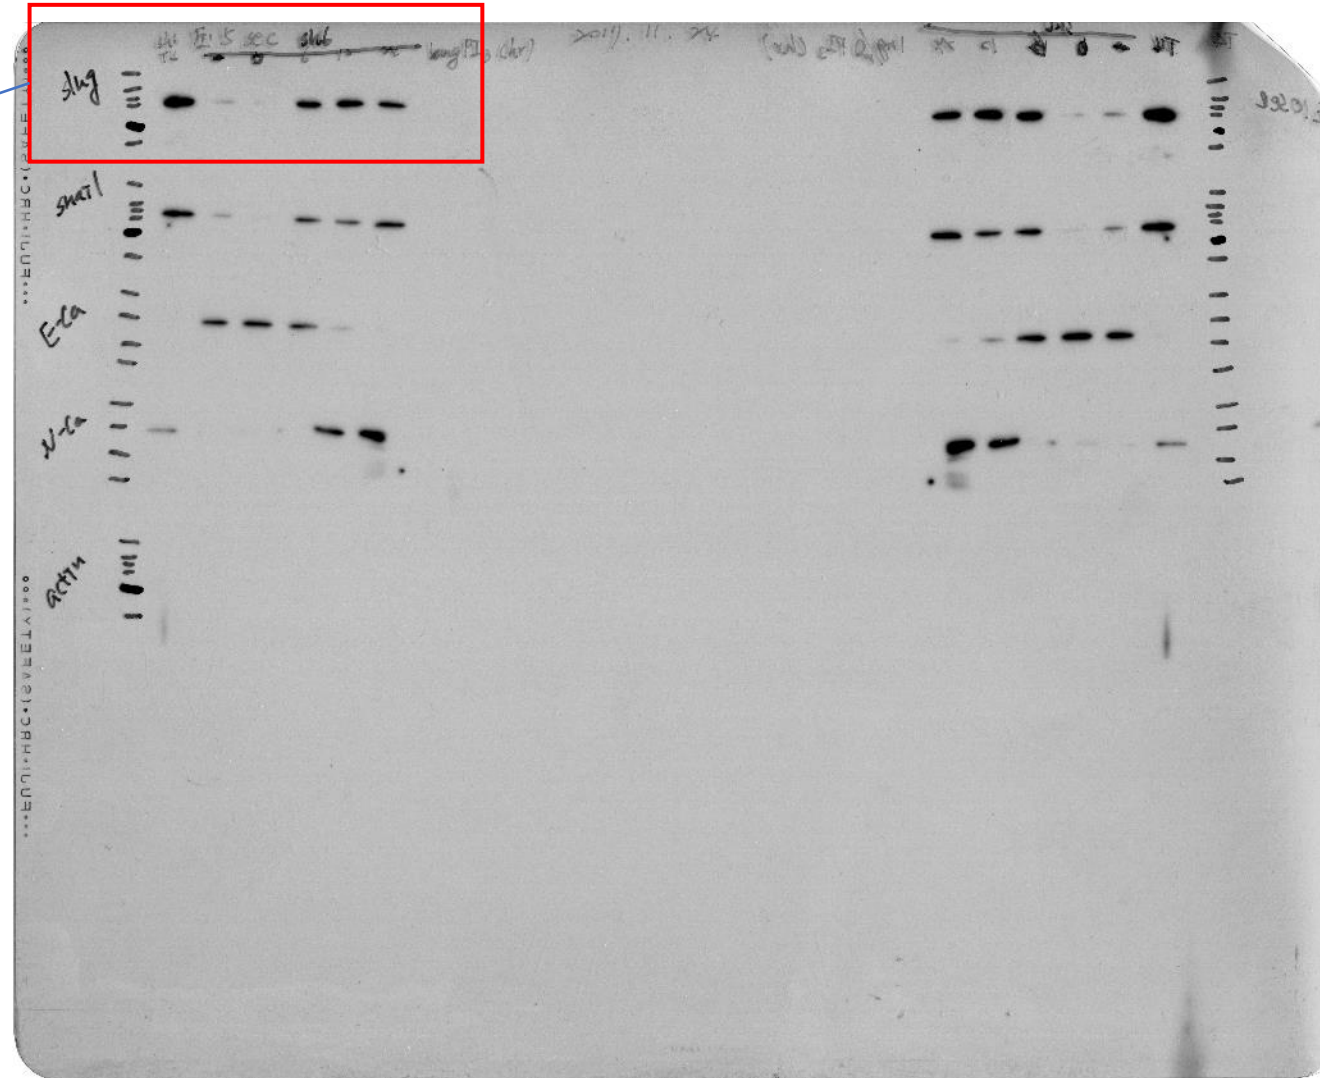



# Full unedited gel for Figure 5E

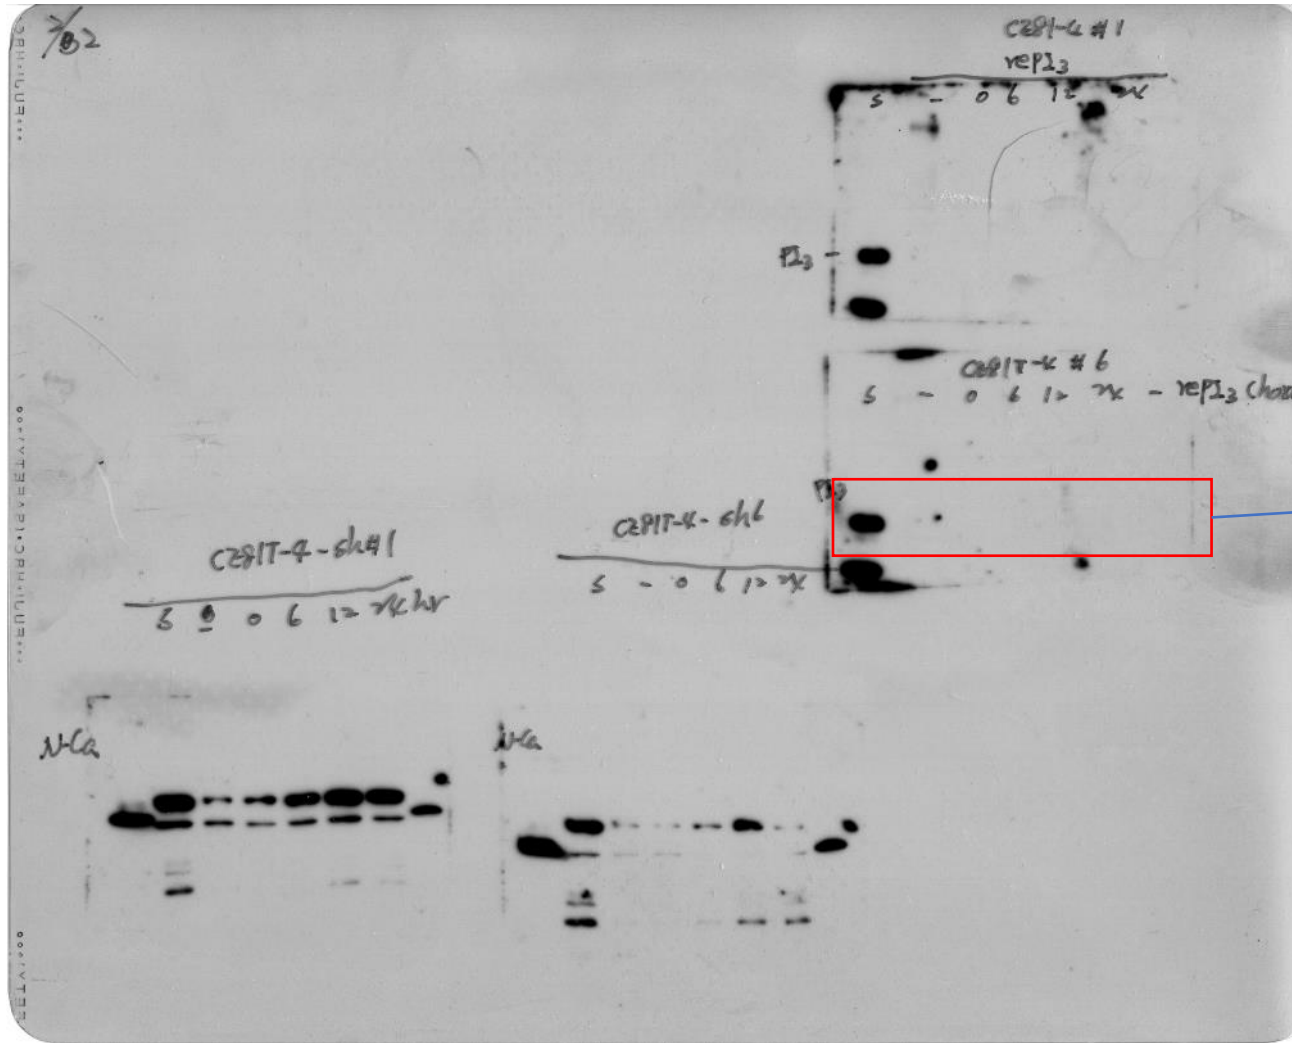

Figure 5E  
CE81T2-4\_shRNA6  
Elafin

# Full unedited gel for Figure 5F

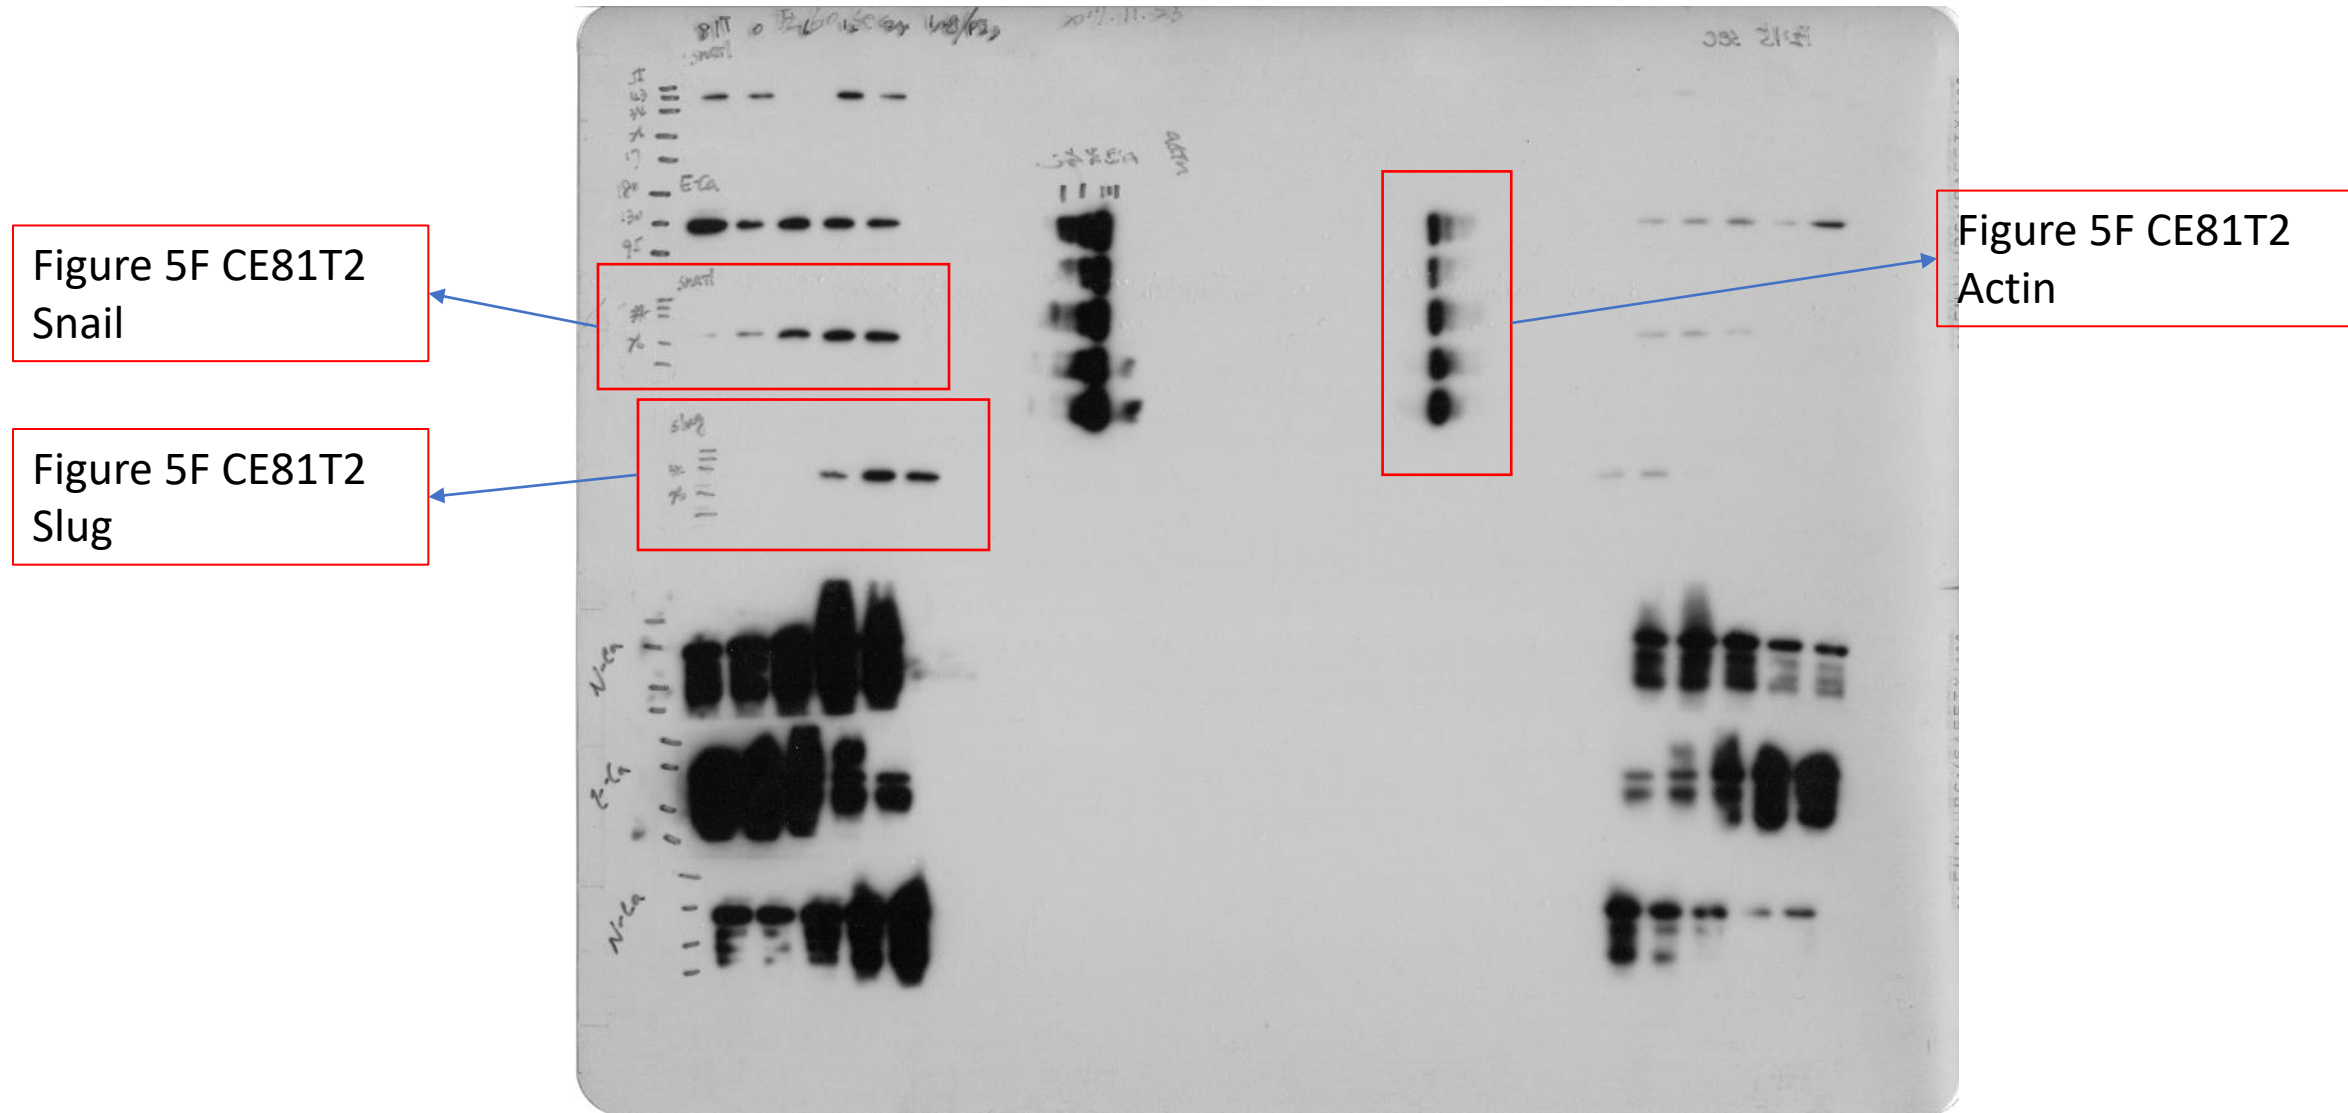

# Full unedited gel for Figure 5F

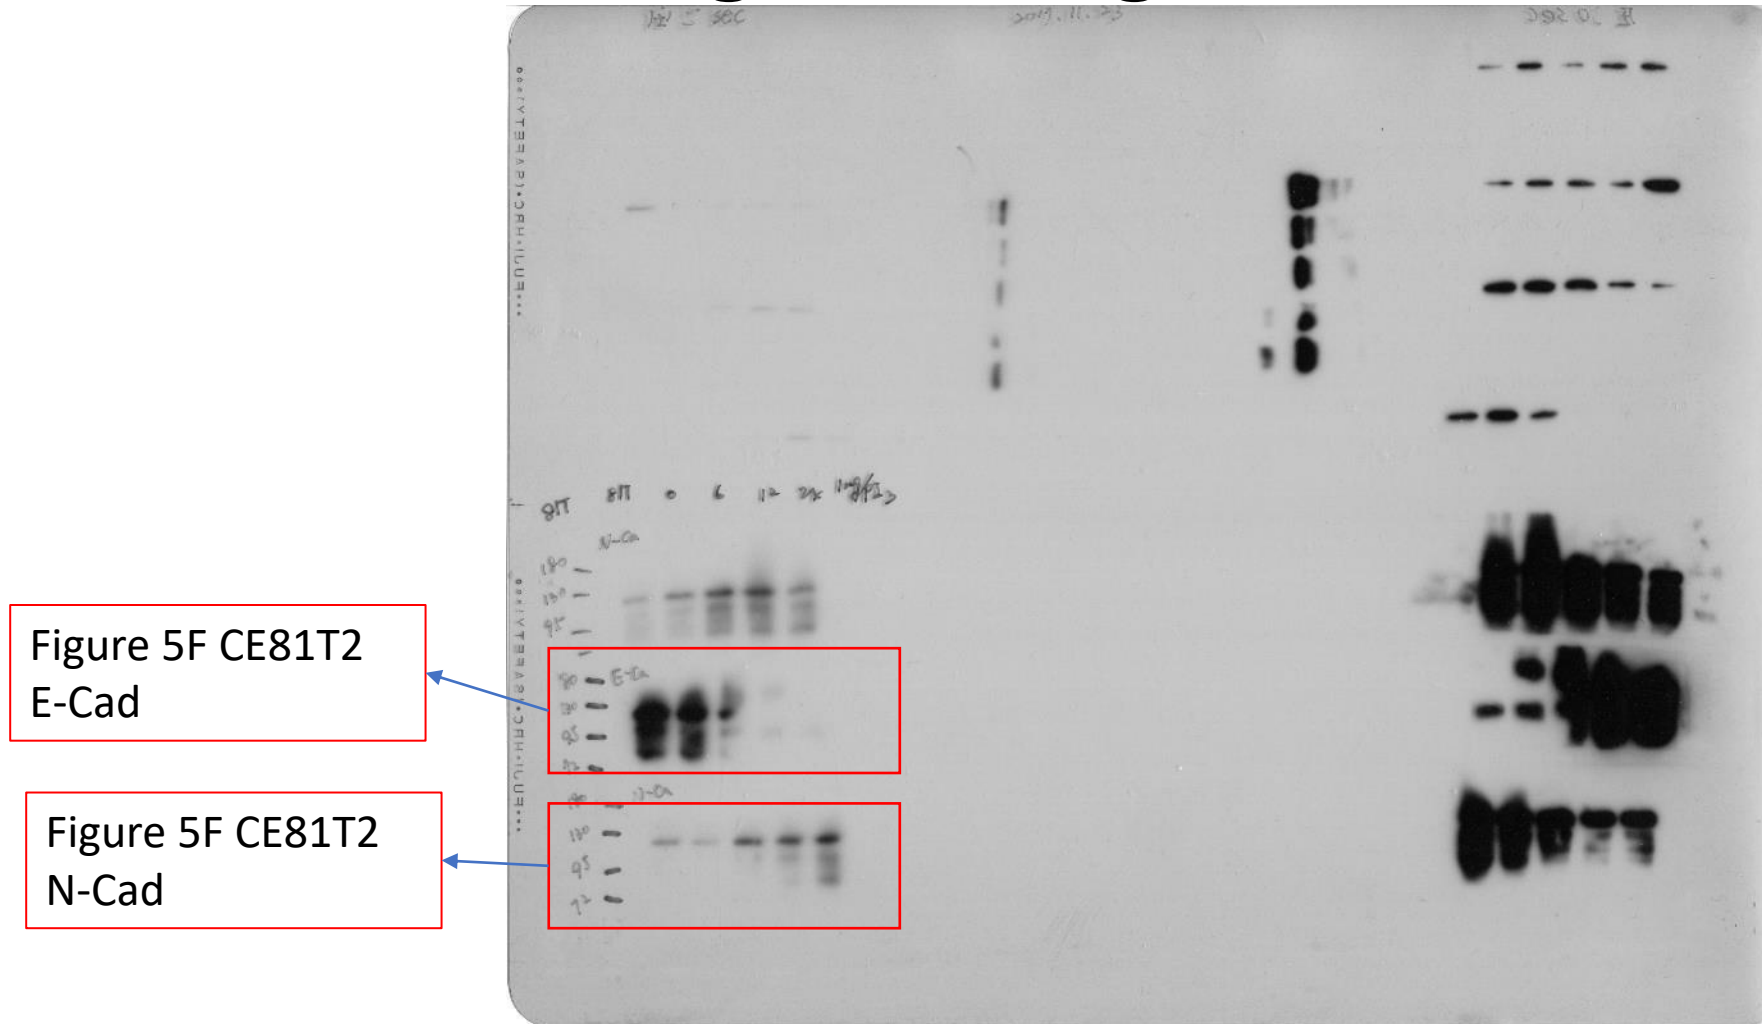

# Full unedited gel for Figure S5C

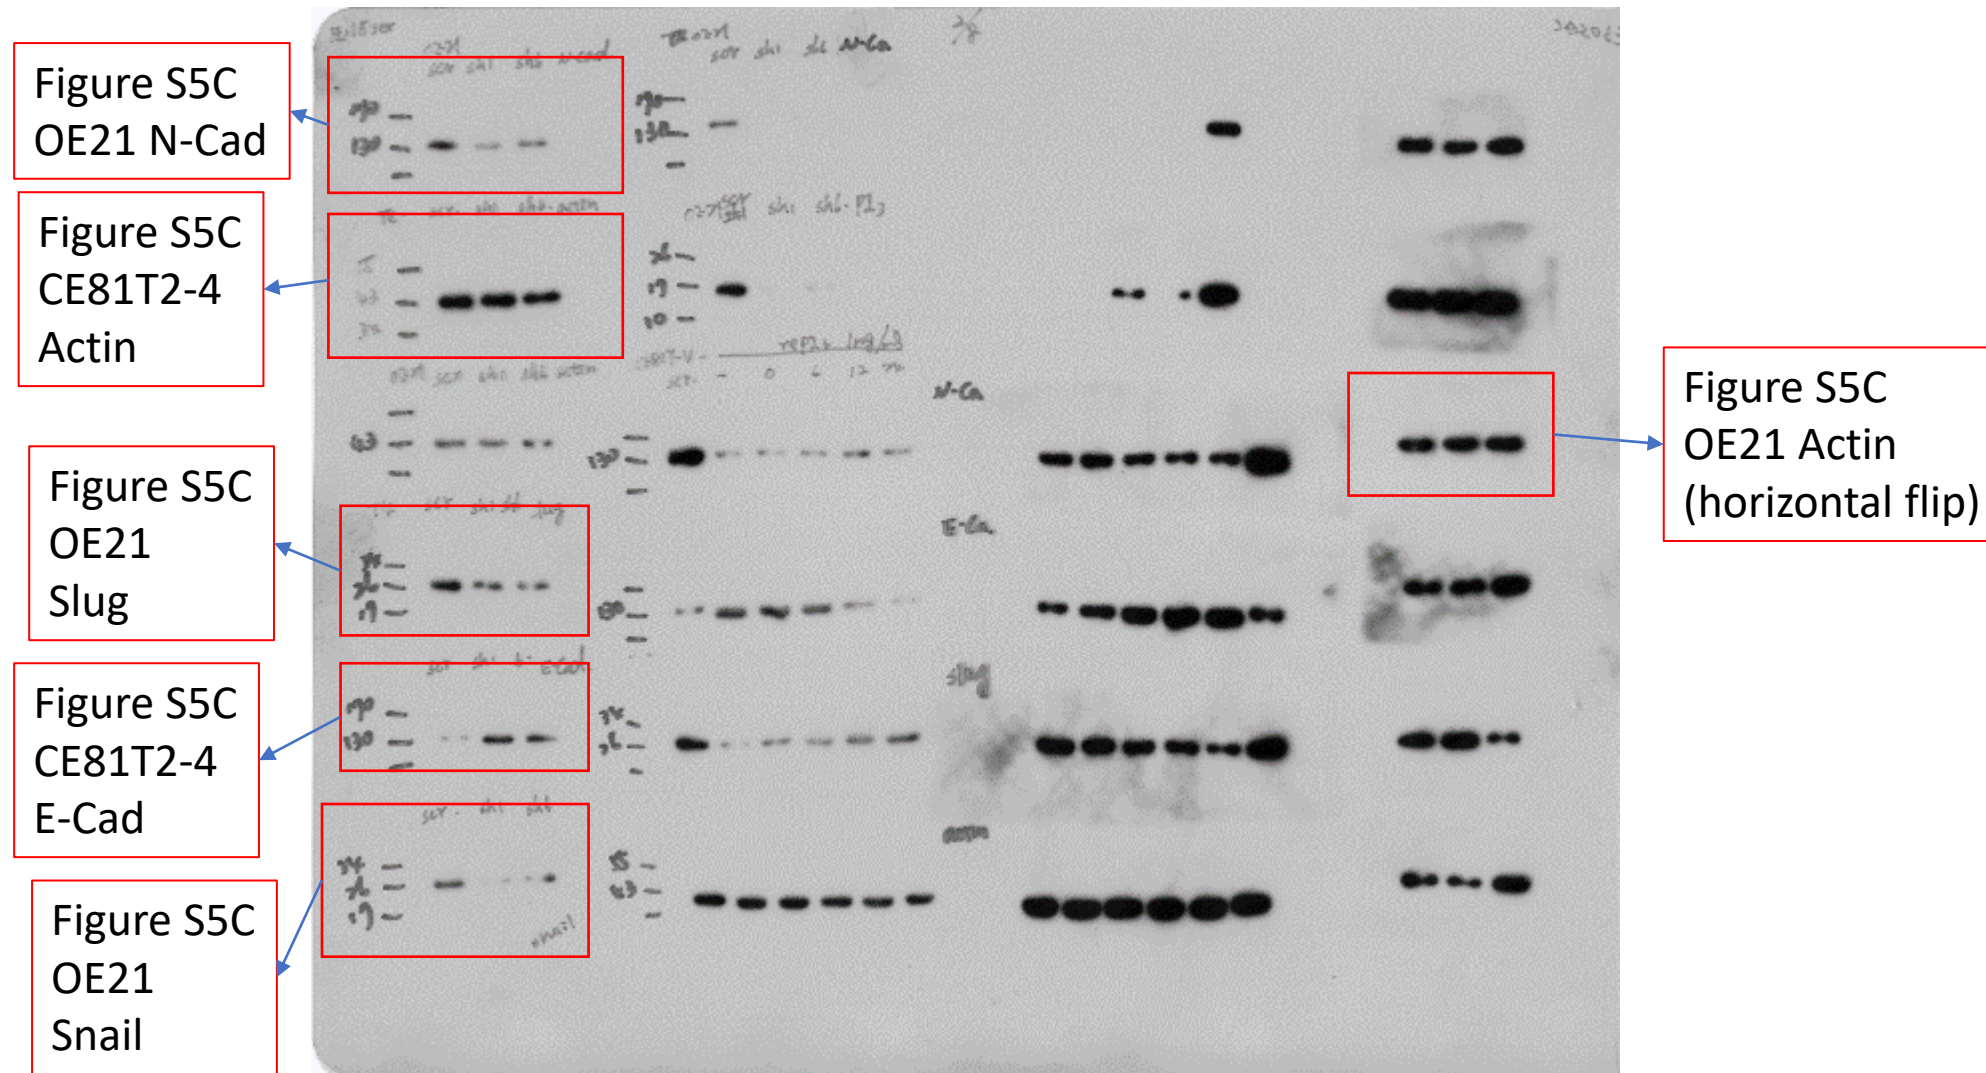



# Full unedited gel for Figure S5C

Figure S5C  
CE81T2-4  
N-Cad

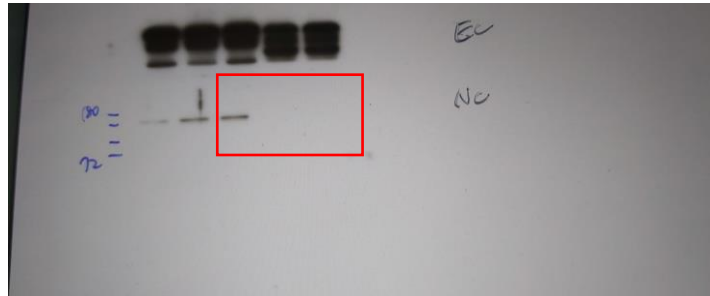

Figure S5C  
OE21 E-Cad

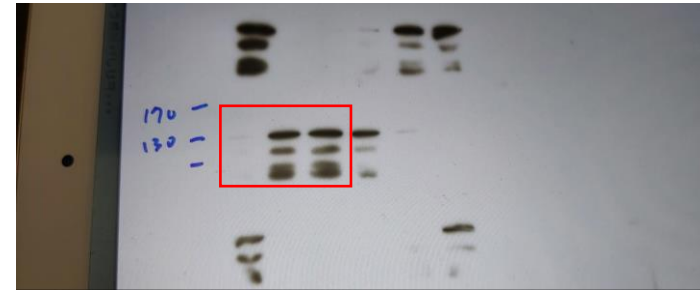

Figure S5C  
CE81T2-4  
Snail

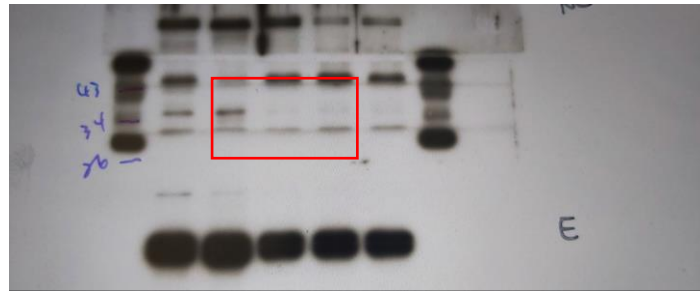

Figure S5C  
CE81T2-4  
Slug

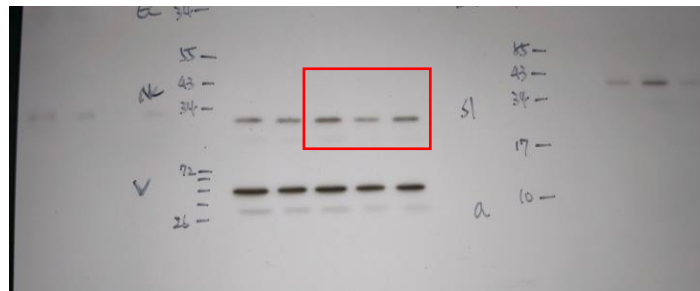

Supplement: s1 [file s1]
